# Supplementary material for: Phase selective synthesis of nickel silicide nanocrystals in molten salts for electrocatalysis of the oxygen evolution reaction
Source: Royal Society of Chemistry journal article supplement (doi:10.1039/d0nr04284f), 2020-01-01
Supplement: d0nr04284f1.pdf [file d0nr04284f1.pdf]

## Electronic Supplementary Information (ESI)

### Phase selective synthesis of nickel silicide nanocrystals in molten salts for electrocatalysis of the oxygen evolution reaction

Ram Kumar,<sup>a</sup> Mounib Bahri,<sup>b</sup> Yang Song,<sup>a</sup> Francisco Gonell,<sup>a</sup> Cyril Thomas,<sup>c</sup> Ovidiu Ersen,<sup>b</sup> Clément Sanchez,<sup>a</sup> Christel Laberty-Robert,<sup>a</sup> David Portehault<sup>a,\*</sup>

<sup>a</sup>. Sorbonne Université, CNRS, Collège de France, Laboratoire de Chimie de la Matière Condensée de Paris (CMCP), 4 place Jussieu, F-75005, Paris, France.

<sup>b</sup>. Université de Strasbourg, CNRS, Institut de physique et de chimie des Matériaux de Strasbourg (IPCMS), 23 rue du Loess, 67200 Strasbourg, France.

<sup>c</sup>. Sorbonne Université, CNRS, Laboratoire de Réactivité de la Surface (LRS), 4 place Jussieu, F-75005, Paris, France

|                                                                                                                                                     |    |
|-----------------------------------------------------------------------------------------------------------------------------------------------------|----|
| <b>Experimental methods</b>                                                                                                                         | 2  |
| <b>Figure S1</b> Powder X-ray diffraction patterns of NiSi and Ni <sub>2</sub> Si compared with the simulated patterns of the corresponding phases. | 4  |
| <b>Figure S2</b> TEM characterization of o-Ni <sub>2</sub> Si nanocrystals                                                                          | 5  |
| <b>Figure S3</b> Particle size distribution of o-Ni <sub>2</sub> Si nanocrystals                                                                    | 6  |
| <b>Figure S4</b> STEM-HAADF and STEM-EDX characterization of o-Ni <sub>2</sub> Si nanocrystals                                                      | 6  |
| <b>Figure S5</b> TEM characterization of NiSi nanocrystals                                                                                          | 7  |
| <b>Figure S6</b> Particle size distribution of NiSi nanocrystals                                                                                    | 7  |
| <b>Figure S7</b> XPS spectra of NiSi nanocrystals                                                                                                   | 7  |
| <b>Table S1</b> XPS peak parameters of NiSi nanocrystals                                                                                            | 8  |
| <b>Figure S8</b> XPS spectra of o-Ni <sub>2</sub> Si nanocrystals                                                                                   | 8  |
| <b>Table S2</b> XPS peak parameters of NiSi nanocrystals                                                                                            | 8  |
| <b>Figure S9</b> XRD patterns showing the chemical stability of the o-Ni <sub>2</sub> Si nanocrystals                                               | 9  |
| <b>Figure S10</b> XRD patterns showing the chemical stability of the NiSi nanocrystals                                                              | 9  |
| <b>Figure S11</b> Nitrogen adsorption-desorption isotherm of NiSi and Ni <sub>2</sub> Si                                                            | 9  |
| <b>Figure S12</b> Cyclic voltammograms of a NiSi sample before and after chronopotentiometry                                                        | 10 |
| <b>Figure S13</b> Cyclic voltammograms of o-Ni <sub>2</sub> Si                                                                                      | 10 |
| <b>Figure S14</b> Si 2p XPS spectra of NiSi electrode after chronopotentiometry stability test                                                      | 11 |
| <b>Table S3</b> Nickel-p-block element compounds and reported OER electrocatalysts                                                                  | 11 |
| <b>References</b>                                                                                                                                   | 12 |

## Experimental methods:

**Reagents and precursors:** All chemicals were obtained from commercial sources (Sigma Aldrich, Alfa Aesar). Commercial reference IrO<sub>2</sub> nanoparticles for the electrochemical measurements were obtained from Alfa Aesar. The anhydrous LiI and KI salts were further dried at 300 °C for 2 days before the synthesis. All synthesis and manipulations were performed into a glovebox and under argon.

**Synthesis of Zintl-Na<sub>4</sub>Si<sub>4</sub>:** The ionic solid silicon precursor Na<sub>4</sub>Si<sub>4</sub> was synthesized by following a modified procedure<sup>1</sup> of Kauzlarich *et al.*<sup>2</sup> Silicon (~ 325 meshes, 99%, Sigma-Aldrich) and NaH (95%, Sigma-Aldrich) powders were mixed in a Si:NaH = 1:2.1 mol. ratio and ball milled for 4 min at 20 Hz (Retsch MM400 ball mill airtight stainless steel bowls of 50 mL, one steel ball of 62.3 g with diameter of 23 mm). The resulting mixture was transferred to a *h*-BN crucible covered with a lid and inserted into a quartz tube. The reaction was performed at 420 °C for 90 h in a vertical furnace under argon flow. After cooling down, the reaction medium was obtained as a two-sided pellet, the bottom part being brown-black and the top part being white. This white residue is made of the side-product NaOH and was carefully scratched away. The blackish pellet was grinded into a fine powder. XRD and solid-state NMR<sup>1</sup> confirmed that the material was made of Na<sub>4</sub>Si<sub>4</sub>. The yield was 93% versus the Si reagent.

**Syntheses of NiSi:** In a typical batch, Na<sub>4</sub>Si<sub>4</sub> (0.375 mmol), NiCl<sub>2</sub> (1.05 mmol) and the LiI-KI eutectic mixture (24 mmol, 3.5 g, 0.63 mol% LiI and 0.37 mol% KI) were mixed by ball milling for 2 min at 20 Hz (Retsch MM400 ball mill airtight stainless steel bowls of 50 mL, one steel ball of 62.3 g with diameter of 23 mm). The mixture was transferred to a carbon crucible inserted into a quartz tube. The reaction was performed at 500 °C for 2.5 h in a vertical furnace under constant argon flow with a heating rate of 10 °C min<sup>-1</sup>. After cooling down, the salts were washed away with a 0.01M HCl solution by washing at least six times and then dried under vacuum overnight at 50 °C. Note that if the starting Na<sub>4</sub>Si<sub>4</sub> powder contained minor amounts of crystalline elemental silicon, this impurity was recovered in the final NiSi product. Hence, only the reactive Zintl phase Na<sub>4</sub>Si<sub>4</sub> participated in the reaction. If Si is present in the crude NiSi product, this impurity can be eliminated by stirring the powder for 2 h in 2 mol L<sup>-1</sup> NaOH, in which nickel silicides are stable. The yield was 91% versus the Ni reagent.

**Synthesis of Ni<sub>2</sub>Si:** In a typical batch, Na<sub>4</sub>Si<sub>4</sub> (0.375 mmol), NiCl<sub>2</sub> (2.85 mmol) and the LiI-KI eutectic mixture (30 mmol, 4.376 g) were used. The reactions were performed at 300 °C for 30 min under constant Ar flow and a heating rate of 10 °C min<sup>-1</sup>. All other procedures were the same as for the NiSi synthesis. The yield was 57% based on Ni.

**Instrumentation and materials characterization:** Powder X-ray diffraction (XRD) was recorded using a Bruker D8 Discover diffractometer with Cu  $K\alpha$  radiation. XRD and electron diffraction patterns were indexed along the 95448-ICSD and 646563-ICSD, 197775- ICSD references from the PDF-4 database for NiSi and Ni<sub>2</sub>Si, respectively. Transmission electron microscopy and elemental mapping were performed using a JEOL 2100F microscope at an accelerating voltage of 200 kV. XPS spectra were recorded on an Omicron spectrometer using an Al  $K\alpha$  source (1486.7 eV) as the source energy. The binding energies were referenced versus the aliphatic C1s peak (284.8 eV). Nitrogen adsorption-desorption isotherms were obtained at 77 K using BELSORB-max. The samples were degassed at 180 °C (3 °C/min) for 16 h before the measurement. Electrochemical measurements were performed on Bio-Logic potentiostat.

**Electrochemical measurements:** The electrochemical measurements were performed on a VPS Biologic potentiostat by employing a glassy carbon (GC) rotating disk electrode (RDE, Radiometer analytical) with a disk surface area of 0.07 cm<sup>2</sup>. A three electrode setup was used with the catalyst coated GC working electrode, a platinum wire as the counter electrode and Ag/AgCl/Sat. KCl as the reference electrode. All measured potential were converted to the reversible hydrogen electrode RHE using  $E_{Ag/AgCl} = 0.197 \text{ V/SHE}$  and  $pH = 13$ . The working electrodes were prepared by polishing the GC surface with diamond (1  $\mu\text{m}$ ) and alumina (0.05  $\mu\text{m}$ ) pastes to reach mirror grade. Catalyst inks were prepared from the electrocatalyst powder, Acetylene Black (AB, Alfa Aesar) (99.9+ %,  $\sim 75 \text{ m}^2/\text{g}$ ) and Nafion-117 solution (5% in aliphatic alcohol, Sigma-Aldrich). The acetylene black powder was mildly functionalized with carboxylate groups to enhance the alcoholic dispersion by treating it in nitric acid.<sup>3</sup> Acetylene black (500 mg) was stirred overnight in 50 mL of HNO<sub>3</sub> (20%) at 80 °C, washed with water and dried under vacuum. The catalyst inks were prepared by dispersing 7 mg of catalyst powder in 5 mL of ethanol (99%), along with 5 mg of treated AB. The mixture was sonicated in a water bath for 2 h to obtain a uniform dispersion. The Nafion solution (220  $\mu\text{L}$ ) was subsequently added and again sonicated for another 20 min. The resulting dispersion was stable and aggregate free for at least 1 week. 2  $\mu\text{L}$  of the catalyst ink was deposited on the GC substrate and dried in air for 30 min before measurement. The effective electrocatalyst loading was approximately 40  $\mu\text{g cm}^{-2}_{\text{disk}}$ . The OER activity was measured in a O<sub>2</sub>-saturated 0.1 M KOH with a rotating disk speed of 1600 rpm and a scan rate of 10 mV s<sup>-1</sup>. The measurements were repeated at least twice with different electrodes to confirm the consistency of the data. Commercial reference IrO<sub>2</sub> nanoparticles for comparison was obtained from Alfa aesar (43396 reference number, diameter ranging between 20 and 100 nm). Note that Commercial IrO<sub>2</sub> 200-400 nm long nanowires supplied by Aldrich (206237 reference number) and used in some previous reports yielded very low OER activity much lower than the nickel silicide particles we report herein. We have not considered this material to benchmark nickel silice nanomaterials.

Electrochemical impedance spectra (EIS) were recorded at the open circuit voltage (OCV,  $\sim 146.9$  mV) of the electrode, employing an AC perturbation of  $10 \text{ mV}_{\text{rms}}$  in the frequency range from 50 kHz to 1 Hz. The resistance of the solution  $R_s$  was obtained from the resulting Nyquist plot and used for ohmic drop correction  $E = E_m - iR_s$ , where  $E$  is the corrected potential and  $E_m$  is the measured potential. The long term performance and stability of the NiSi catalyst was evaluated employing chronopotentiometry at a current density of  $5 \text{ mA cm}^{-2}_{\text{disk}}$  in  $\text{O}_2$ -saturated 0.1 M KOH electrolyte and rotating speed of 1600 rpm. An optimum  $5 \text{ mA cm}^{-2}_{\text{disk}}$  current density was selected for the stability test to avoid mechanical breakage of the composite electrode film by  $\text{O}_2$  bubbles evolving at higher current density. The electrocatalyst sample was examined after chronopotentiometry by XPS and TEM.

❖ Reported phases of nickel silicides:  $\text{Ni}_3\text{Si}$ ,  **$\text{Ni}_2\text{Si}$** ,  $\text{Ni}_{3/1}\text{Si}_{1/2}$ ,  $\text{Ni}_3\text{Si}_2$ ,  **$\text{NiSi}$** ,  $\text{NiSi}_2$

Ni:Si =  $\frac{3}{1}$   $\frac{2}{1}$   $\frac{2.5}{1}$   $\frac{1.5}{1}$   $\frac{1}{1}$   $\frac{1}{2}$

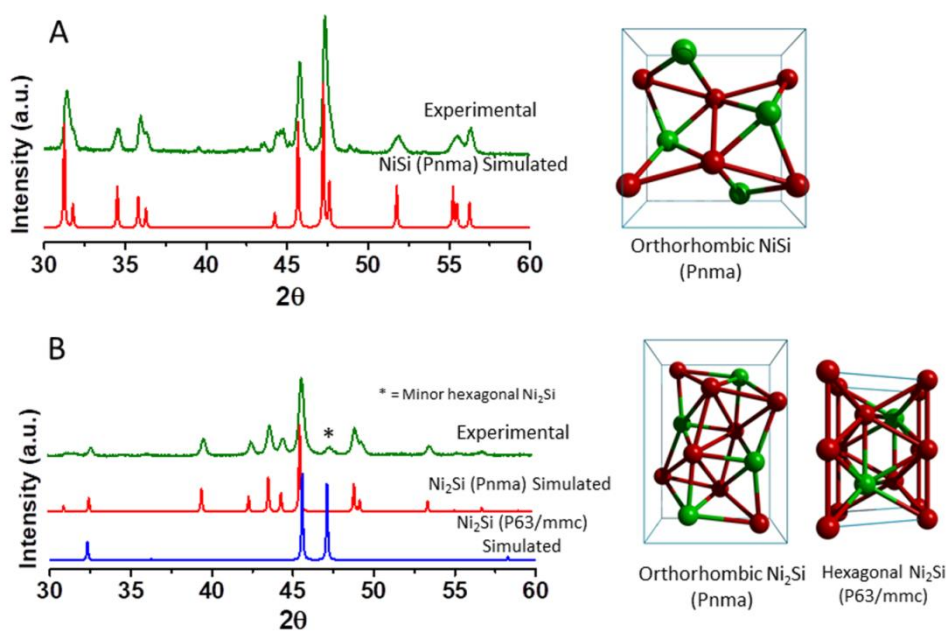

**Fig. S1** Powder X-ray diffraction patterns of (A) NiSi and (B) Ni<sub>2</sub>Si compared with the simulated patterns of the corresponding phases. Red ball = Ni and green ball = Si in the nickel silicide structures. NiSi orthorhombic *Pnma* (62) ( $a = 5.17\text{\AA}$ ,  $b = 3.33\text{\AA}$ ,  $c = 5.6\text{\AA}$ ), Ni<sub>2</sub>Si major orthorhombic *Pnma* (62) ( $a = 4.97\text{\AA}$ ,  $b = 3.75\text{\AA}$ ,  $c = 7.06\text{\AA}$ ), Ni<sub>2</sub>Si minor hexagonal *P63/mmc* (194) ( $a = 3.85 \text{\AA}$ ,  $c = 4.95$ ).

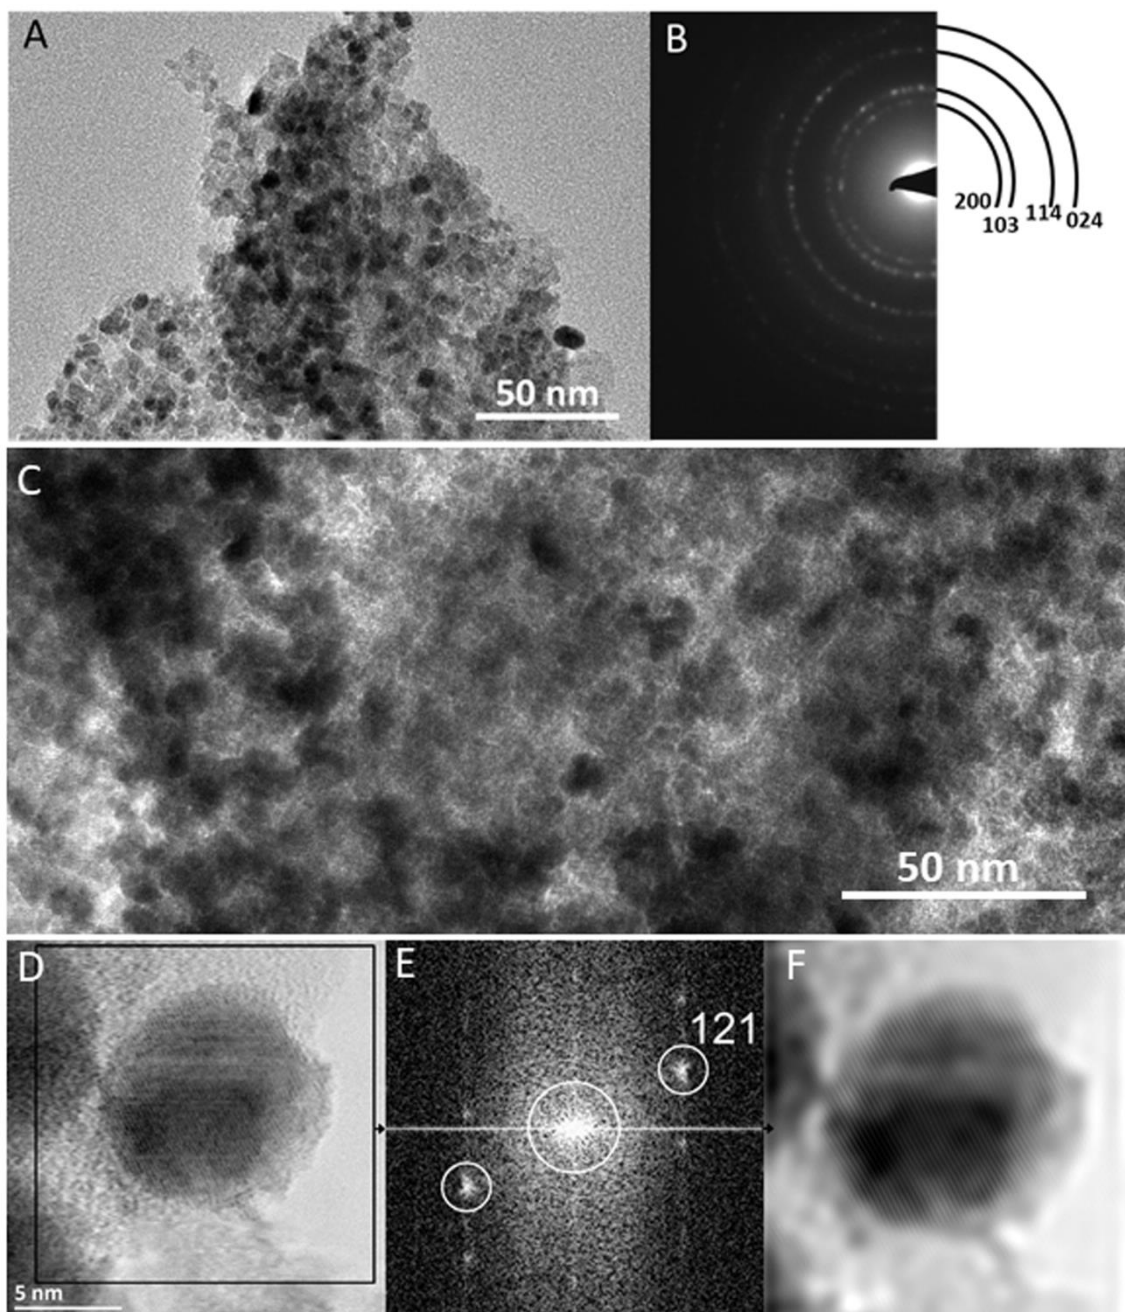

**Fig. S2** (A, C) TEM image and (B) selected area electron diffraction (SAED) of  $\text{Ni}_2\text{Si}$  nanocrystals. (D) High-resolution HRTEM showing a  $\text{Ni}_2\text{Si}$  nanocrystal. (E) Corresponding FFT indexed along the  $o\text{-Ni}_2\text{Si}$  structure and showing the spots used for FFT filtering to yield the image in (F).

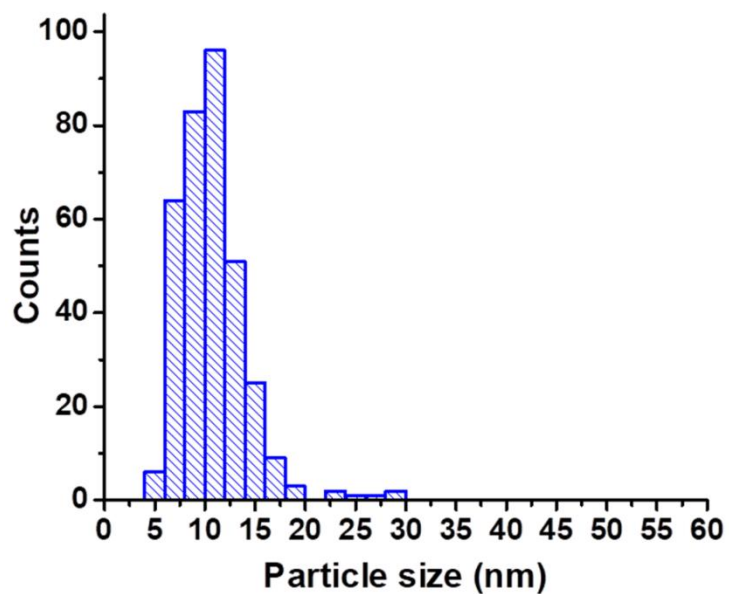

**Fig. S3** Particle size distribution of o-Ni<sub>2</sub>Si nanocrystals.

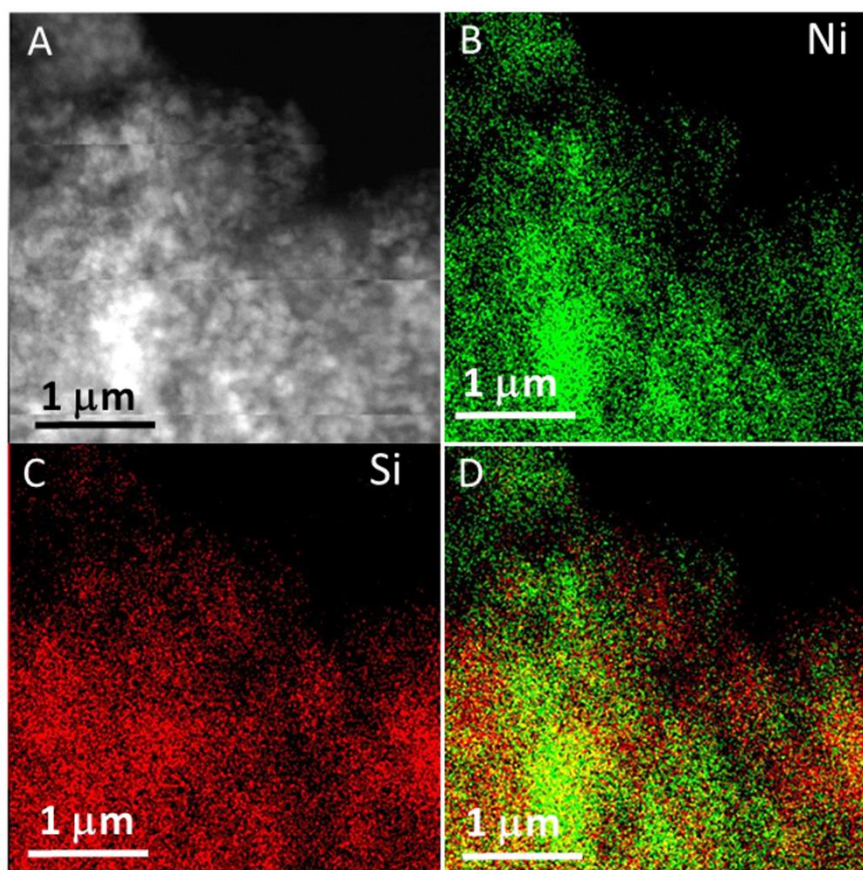

**Fig. S4** (A) STEM-HAADF image and corresponding STEM-EDX mapping of o-Ni<sub>2</sub>Si nanocrystals showing a homogenous distribution of (B) nickel (green), (C) silicon (red) and (D) Ni with Si.



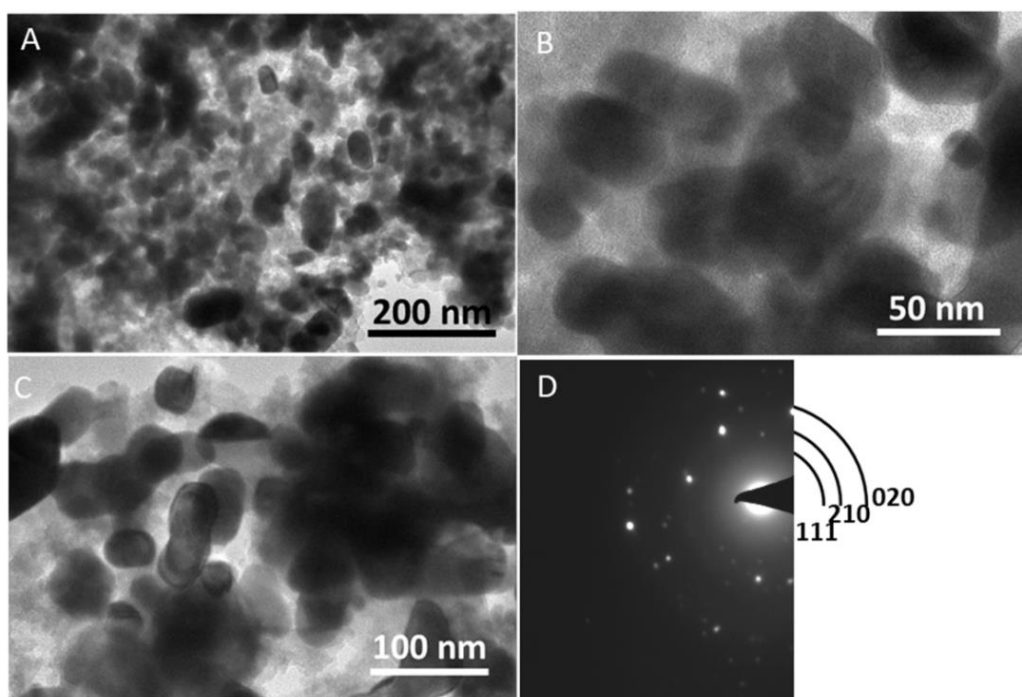

**Fig. S5** TEM images and corresponding SAED pattern of NiSi nanocrystals.

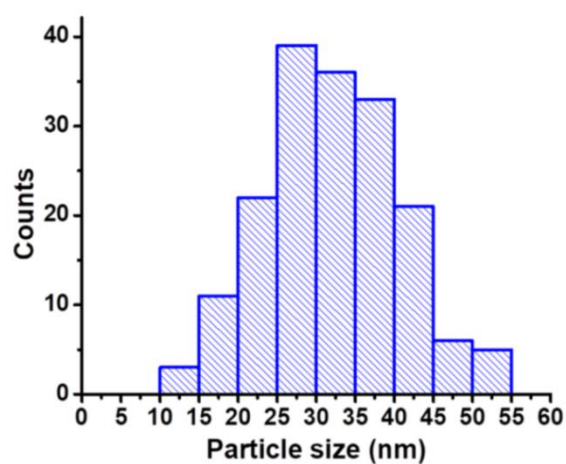

**Fig. S6** Particle size distribution of NiSi nanocrystals.

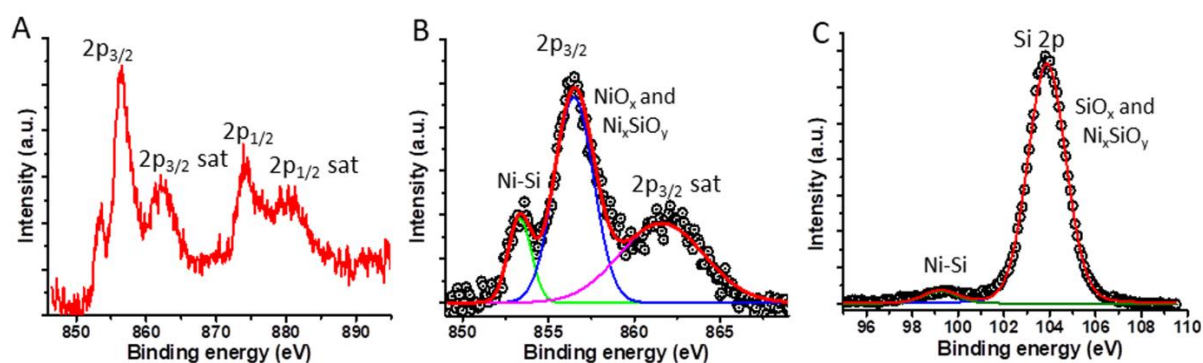

**Fig. S7** (A, B) Ni  $2p_{1/2}$  and  $2p_{3/2}$ , (B) Ni  $2p_{3/2}$  fitted to different chemical environments and (C) Si  $2p$  core level regions of XPS spectra of NiSi nanocrystals.

**Table S1:** XPS peak parameters of NiSi nanocrystals. The peaks are referenced with respect to the aliphatic C1s signal (284.8 eV).

| Core level                     | Binding energy (eV) | Assignment                                                          |
|--------------------------------|---------------------|---------------------------------------------------------------------|
| Ni 2p <sub>3/2</sub>           | 853.3               | Intermetallic Ni-Si bond                                            |
| Ni 2p <sub>3/2</sub>           | 856.5               | Oxidized NiSi surface NiO <sub>x</sub> and NiSiO <sub>x</sub>       |
| Ni 2p <sub>3/2</sub> satellite | 861.6               | -                                                                   |
| Ni 2p <sub>1/2</sub>           | 874.2               | -                                                                   |
| Ni 2p <sub>1/2</sub> satellite | 880.2               |                                                                     |
| Si 2p                          | 99.2                | Intermetallic Ni-Si bond                                            |
| Si 2p                          | 103.8               | SiO <sub>x</sub> and Ni <sub>x</sub> SiO <sub>y</sub> surface layer |

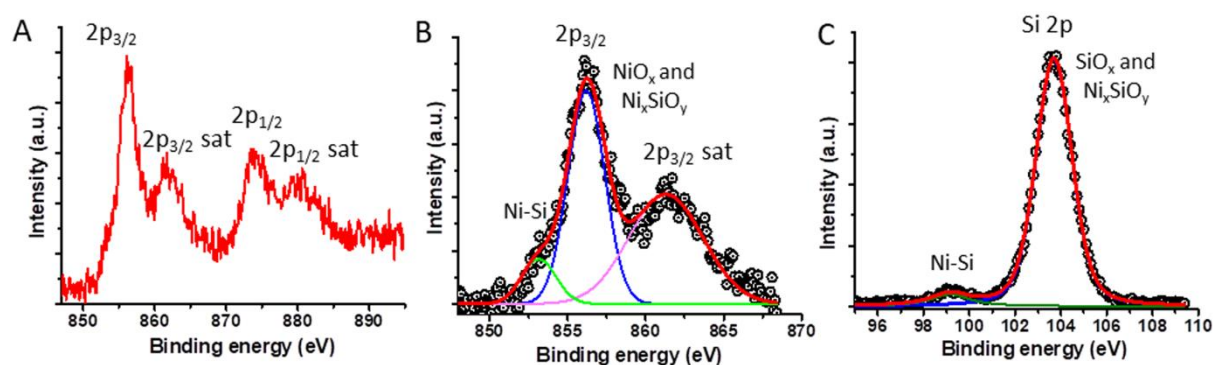

**Fig. S8** (A, B) Ni 2p<sub>1/2</sub> and 2p<sub>3/2</sub>, (B) Ni 2p<sub>3/2</sub> fitted to different chemical environments (C) Si 2p core level regions of XPS spectra of o-Ni<sub>2</sub>Si nanocrystals.

**Table S2:** XPS peak parameters of Ni<sub>2</sub>Si nanocrystals. The peaks are referenced with respect to the aliphatic C1s signal (284.8 eV).

| Core level                     | Binding energy (eV) | Assignment                                                                                |
|--------------------------------|---------------------|-------------------------------------------------------------------------------------------|
| Ni 2p <sub>3/2</sub>           | 853.1               | Intermetallic Ni-Si bond                                                                  |
| Ni 2p <sub>3/2</sub>           | 856.2               | Oxidized Ni <sub>2</sub> Si surface NiO <sub>x</sub> and Ni <sub>x</sub> SiO <sub>y</sub> |
| Ni 2p <sub>3/2</sub> satellite | 861.3               | -                                                                                         |
| Ni 2p <sub>1/2</sub>           | 844.2               | -                                                                                         |
| Ni 2p <sub>1/2</sub> satellite | 880.2               | -                                                                                         |
| Si 2p                          | 99.2                | Intermetallic Ni-Si bond                                                                  |
| Si 2p                          | 103.7               | SiO <sub>x</sub> and Ni <sub>x</sub> SiO <sub>y</sub> surface layer                       |



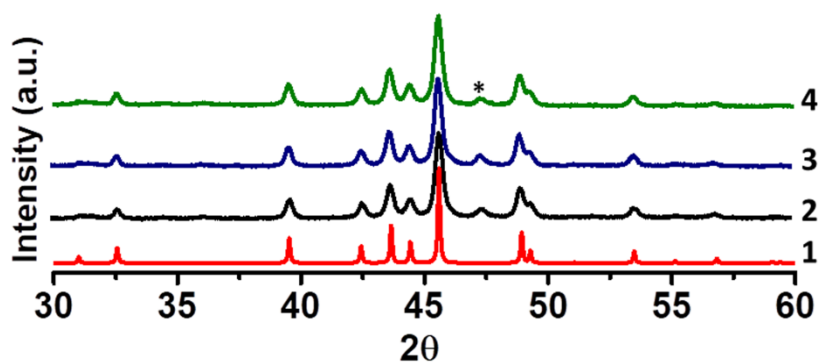

**Fig. S9** Structural stability of Ni<sub>2</sub>Si in different chemical environments. Powder XRD pattern of (1) simulated orthorhombic Ni<sub>2</sub>Si, (2) pristine Ni<sub>2</sub>Si, (3) in 0.1 M HCl solution for 12 h, (4) in 2 mol L<sup>-1</sup> NaOH solution for 5 h. The asterisk corresponds to the Ni<sub>2</sub>Si hexagonal polymorph.

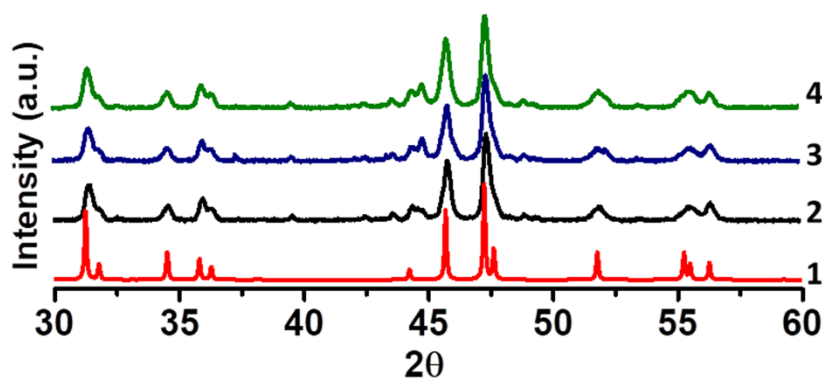

**Fig. S10** Structural stability of NiSi in different chemical environments. XRD pattern of (1) simulated NiSi, (2) pristine NiSi, (3) in 0.1 M HCl solution for 12 h, (4) in 2 mol L<sup>-1</sup> NaOH solution for 5 h.

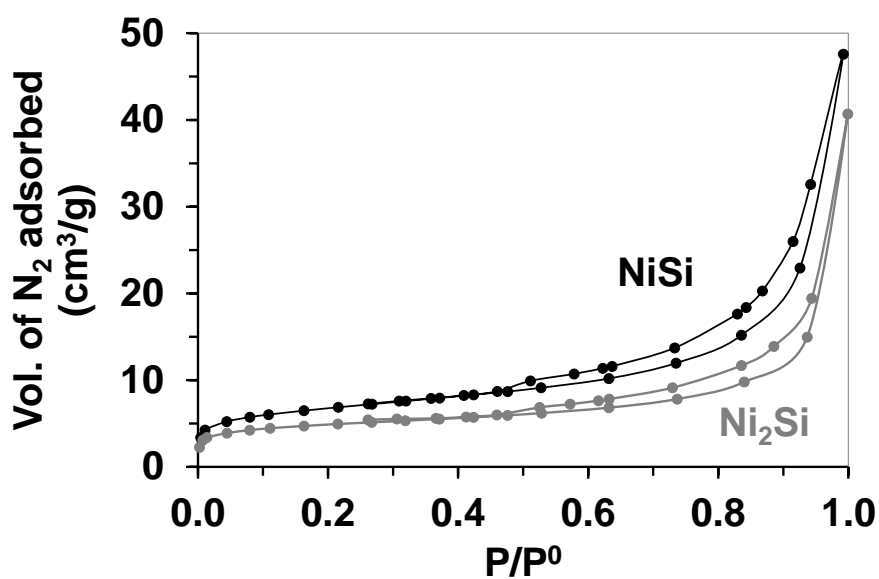

**Fig. S11** Nitrogen adsorption-desorption isotherms of NiSi and o-Ni<sub>2</sub>Si at 77 K.

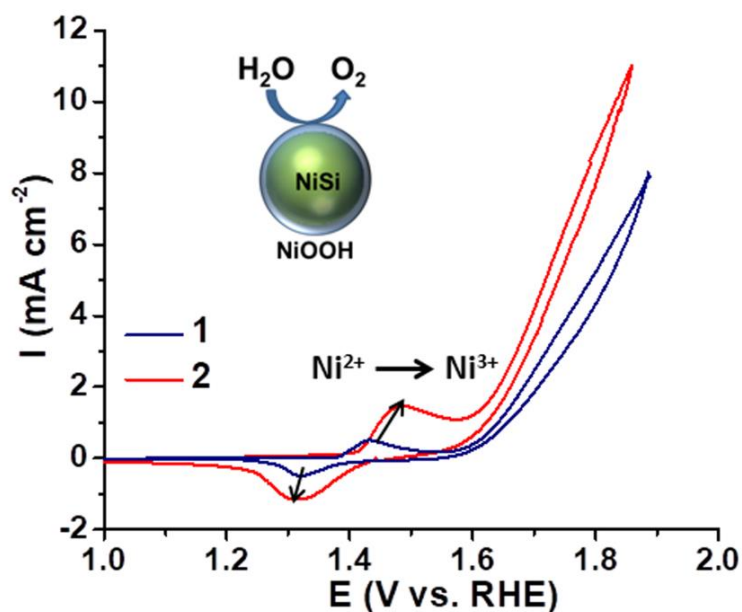

**Fig. S12** Cyclic voltammograms (CVs) of NiSi before (1 blue) and after (2 red) 17 h chronopotentiometry stability test with a scan rate of  $10 \text{ mV s}^{-1}$  in  $\text{O}_2$ -saturated  $0.1 \text{ M KOH}$  on a disk electrode rotating at 1600 rpm. The potential was corrected for  $iR_s$  drop. The CVs show an increase in the  $\text{Ni}^{2+} \rightarrow \text{Ni}^{3+}$  area due to the formation of electrochemically active NiOOH at the surface of the particles. The OER current density increases at the same time as surface oxidation activates the material.

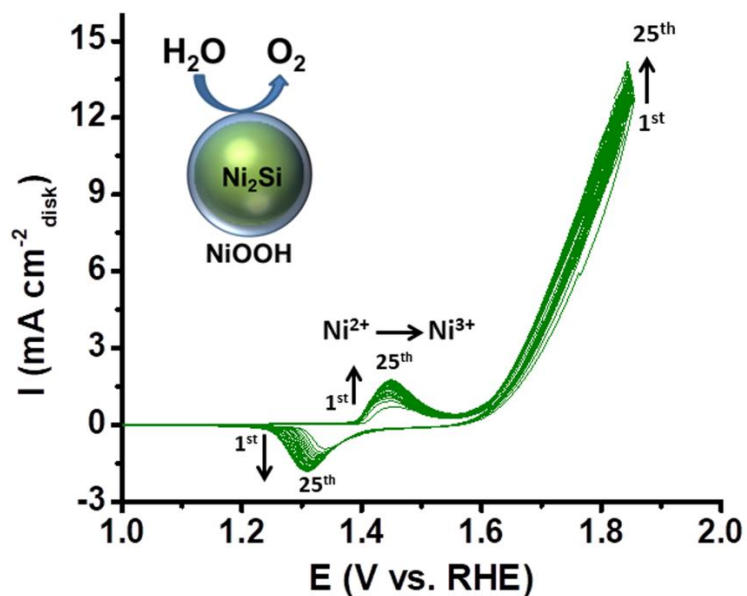

**Fig. S13** Cyclic voltammograms (CVs) of o-Ni<sub>2</sub>Si (first 25 cycles) with a scan rate of  $10 \text{ mV s}^{-1}$  in  $\text{O}_2$ -saturated  $0.1 \text{ M KOH}$  on a disk electrode rotating at 1600 rpm. The potential was corrected for  $iR_s$  drop. The CVs show an increase in the  $\text{Ni}^{2+} \rightarrow \text{Ni}^{3+}$  area due to the formation of electrochemically active NiOOH at the surface of the particles. The OER current density increases at the same time as surface oxidation activates the material.

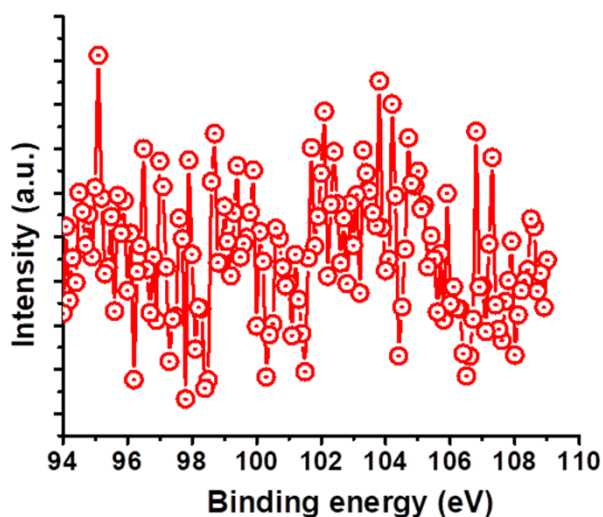

**Fig. S14** Si 2p core level region of NiSi electrode after 17 h chronopotentiometry at 5 mA cm<sup>-2</sup> disk.

**Table S3:** Nickel-p-block element compounds as OER electrocatalysts. Comparison of some key values from the literature.

| Material                                             | Reference    | Measurement condition                          | Catalyst loading (μg cm <sup>-2</sup> <sub>disk</sub> ) | I at 1.7 V/RHE (mA cm <sup>-2</sup> <sub>disk</sub> ) | Mass activity: Catalyst mass-normalized current at 1.7 V/RHE (mA . mg <sup>-1</sup> ) | Mole activity: Current normalized to Ni content at 1.7 V/RHE (A . mmol of Ni <sup>-1</sup> ) |
|------------------------------------------------------|--------------|------------------------------------------------|---------------------------------------------------------|-------------------------------------------------------|---------------------------------------------------------------------------------------|----------------------------------------------------------------------------------------------|
| NiSi<br>Ni <sub>2</sub> Si                           | Present work | 0.1 M KOH, glassy carbon, 3 electrode          | 40                                                      | 4.8 (NiSi)<br>5.0 (Ni <sub>2</sub> Si)                | 120, 125                                                                              | 10.4, 9.1                                                                                    |
| Ni <sub>3</sub> Se <sub>4</sub>                      | 4            | 0.1 M KOH, carbon paper                        | 500                                                     | 60                                                    | 120                                                                                   | 19.7                                                                                         |
| Cu <sub>2-x</sub> Se/Ni <sub>3</sub> Se <sub>4</sub> | 4            | 0.1 M KOH, carbon paper                        | 500                                                     | 100                                                   | 200                                                                                   |                                                                                              |
| Ni <sub>x</sub> B                                    | 5            | 1M KOH, glassy carbon electrode                | 210                                                     | 30                                                    | 143                                                                                   | -                                                                                            |
| Ni <sub>3</sub> B                                    | 6            | 1M KOH, glassy carbon electrode                | 300                                                     | 20                                                    | 67                                                                                    | 4.2                                                                                          |
| Ni <sub>3</sub> Se <sub>2</sub>                      | 7            | 0.3 M KOH, Au coated glass substrate electrode | 435                                                     | 32                                                    | 74                                                                                    | 8.2                                                                                          |
| Ni <sub>3</sub> N/Ni foam                            | 8            | 1M KOH, Ni foam support electrode              | -                                                       | 60                                                    | -                                                                                     | -                                                                                            |
| Ni <sub>2</sub> P                                    | 9            | 1M KOH, Ni foam support electrode              | 5000                                                    | 30                                                    | 6                                                                                     | 0.45                                                                                         |

## References:

- 1 A. Courac, Y. Le Godec, C. Renero-Lecuna, H. Moutaabbid, R. Kumar, C. Coelho-Diogo, C. Gervais and D. Portehault, *Inorg. Chem.*, 2019, **58**, 10822–10828.
- 2 X. Ma, F. Xu, T. M. Atkins, A. M. Goforth, D. Neiner, A. Navrotsky and S. M. Kauzlarich, *Dalt. Trans.*, 2009, 10250–10255.
- 3 J. Suntivich, H. A. Gasteiger, N. Yabuuchi and Y. Shao-Horn, *J. Electrochem. Soc.*, 2010, **157**, B1263.
- 4 S. Kim, H. Mizuno, M. Saruyama, M. Sakamoto, M. Haruta, H. Kurata, T. Yamada, K. Domen and T. Teranishi, *Chem. Sci.*, 2020, **11**, 1523–1530.
- 5 J. Masa, I. Sinev, H. Mistry, E. Ventosa, M. de la Mata, J. Arbiol, M. Muhler, B. Roldan Cuenya and W. Schuhmann, *Adv. Energy Mater.*, 2017, **7**, 1700381.
- 6 W.-J. Jiang, S. Niu, T. Tang, Q.-H. Zhang, X.-Z. Liu, Y. Zhang, Y.-Y. Chen, J.-H. Li, L. Gu, L.-J. Wan and J.-S. Hu, *Angew. Chemie Int. Ed.*, 2017, **56**, 6572–6577.
- 7 A. T. Swesi, J. Masud and M. Nath, *Energy Environ. Sci.*, 2016, **9**, 1771–1782.
- 8 M. Shalom, D. Ressnig, X. Yang, G. Clavel, T. P. Fellingner and M. Antonietti, *J. Mater. Chem. A*, 2015, **3**, 8171–8177.
- 9 L. A. Stern, L. Feng, F. Song and X. Hu, *Energy Environ. Sci.*, 2015, **8**, 2347–2351.
